# Supplementary material for: Longitudinal analysis of resting energy expenditure and body mass composition in physically active children and adolescents
Source: BMC Pediatr. 2022 May 10;22:260. doi: 10.1186/s12887-022-03326-x (PMC9088021; doi:10.1186/s12887-022-03326-x)
Supplement: Supplementary file 1 — Additional file 1. [file 12887_2022_3326_MOESM1_ESM.xlsx]

## Sheet: Data
Second measurement													First measurement
Sex	REE [kcal]	Age [years]	Height [cm]	weight [kg]	BMI	FAT [%]	FFM [kg]	TBW [kg]	HC [cm]	WC [cm]	SBP	DBP	REE [kcal]	Age [years]	Height[cm]	Weight [kg]	BMI	FAT [%]	FFM [kg]	TBW [kg]	HC [cm]	WC [cm]	SBP	DBP
M	1388	11	144	37.7	18.2	16.8	31.4	23	79	61	101	64	1352	10	143	36.5	17.8	17	30.3	22.2	75	59	118	69
M	1335	10	151	37.4	16.4	15.4	31.6	23.1	75	61	109	61	1290	10	147	34.1	15.8	16.1	28.6	20.9	70	58	110	66
M	1561	10	142	40.7	20.2	20	32.6	23.9	81	65	97	63	1475	9	140	38.3	19.5	20.2	30.6	22.4	74	65	114	66
M	1598	9	137	32	17	19.3	25.8	18.9	73	56	89	54	1460	9	136	31.5	17	20.1	25.2	18.4	72	58	93	56
M	1414	10	142	29.2	14.5	15.7	24.6	18	66	57	99	63	1318	10	141	27.9	14	14.3	23.9	17.5	65	55	115	71
M	1465	10	149	37.8	17	15.1	32.1	23.5	79	60	105	64	1354	10	145	35.8	17	15.3	30.3	22.2	72	63	100	57
M	1293	9	138	30.6	16.1	15.5	25.9	19	72	55	100	55	1285	9	135	28.6	15.7	15.6	24.1	17.6	64	55	113	69
M	1548	9	146	41.8	19.6	25.6	31.1	22.8	80	65	126	67	1555	9	144	39.9	19.2	24.9	30	22	78	64	120	74
M	1295	10	141	32.1	16.1	18.1	26.3	19.3	75	59	111	69	1466	9	139	30.2	13.6	13.6	26.1	19.1	68	59	104	57
K	1381	9	129	25.3	15.2	19.7	20.3	14.9	69	57	105	58	1221	9	127	24.6	15.3	20.3	19.6	14.3	64	54	111	69
M	1596	9	145	37.6	17.9	20.3	30	22	76	59	98	68	1440	9	142	36.2	18	20.2	28.9	21.2	73	61	100	56
M	1443	9	142	32.3	16	21	25.5	18.7	73	59	87	51	1526	9	139	31.2	16.1	20.5	24.8	18.2	69	58	87	47
M	1741	11	137	30.8	16.4	17	25.6	18.7	71	59	101	58	1499	10	135	29	15.9	16.5	24.2	17.7	67	57	119	69
M	1660	10	142	31.6	15.7	16.9	26.3	19.3	71	59	94	56	1372	10	139	30.2	15.6	16.9	25.1	18.4	65	63	91	59
M	1385	10	140	33	16.8	19.3	26.6	19.5	75	57	102	56	1344	10	137	32.2	17.2	20.6	25.6	18.7	71	57	104	49
M	1523	10	135	27.2	14.9	18	22.3	16.3	69	57	98	60	1417	10	133	24.8	14	17	20.6	15.1	64	56	88	56
M	1544	9	137	31.9	17	21	25.2	18.4	75	6	88	57	1508	9	133	30.4	17.2	21.2	24	17.6	71	61	85	53
M	1458	9	141	33.2	16.7	21.5	26.1	19.1	75	55	90	52	1351	9	138	31.4	16.5	21.3	24.7	18.1	70	60	89	54
M	1836	12	146	37.6	17.6	16.5	31.4	23	77	63	101	61	1704	11	145	35.1	16.7	16.7	29.2	21.4	70	54	98	59
M	1274	11	140	29	14.8	17.4	24	17.6	68	55	100	63	1270	10	139	28.3	14.6	15.6	23.9	17.5	65	50	89	57
M	1664	11	159	45.6	18	19.9	36.5	26.7	73	59	96	50	1570	11	155	41.1	17.1	18.5	33.5	24.5	79	62	114	49
M	1620	11	152	41.9	18.1	19.6	33.7	24.7	69	57	105	71	1504	11	150	38.4	17.1	17.1	31.8	23.3	72	56	90	50
M	1300	11	147	35.9	16.6	15.8	30.2	22.1	73	59	107	65	1260	11	145	34.4	16.4	16.7	28.7	21	73	60	110	70
M	1452	11	141	32.1	16.1	16.9	26.7	19.5	67	58	97	60	1354	10	139	31	16	17.1	25.7	18.8	74	60	104	63
M	1784	11	155	45.2	18.8	20.6	35.9	26.3	78	65	110	80	1575	11	153	44.1	18.8	20.3	35.1	25.7	78	59	96	60
M	1589	11	158	56.8	22.8	32.7	38.2	28	92	81	129	65	1735	11	156	53.6	22	33.4	35.7	26.1	85	72	121	65
M	1472	11	150	35	15.6	17.2	29	21.2	74	57	87	53	1613	10	148	33.8	15.4	17.8	27.8	20.3	69	51	95	58
M	1582	12	160	57.2	22.3	25.7	42.5	31.1	94	75	132	77	1997	11	158	55.4	22.2	26.6	40.7	29.8	86	66	136	55
M	1559	11	149	38.5	17.3	21	30.4	22.3	79	62	95	57	1519	10	148	35.4	16.2	19	28.7	21	71	55	94	57
M	1424	12	140	34.9	17.8	21.6	27.4	20.1	66	55	103	56	1187	11	137	33.7	18	22.2	26.2	19.2	70	54	93	59
M	1539	11	146	36	16.9	18.4	29.4	21.5	75	57	101	58	1448	11	145	34.7	16.5	16.7	28.9	21.2	70	55	97	54
M	1502	10	145	36.1	17.2	20.8	28.6	20.9	76	60	98	64	1744	10	142	34.1	16.9	20.6	27.1	19.8	78	63	105	62
M	1438	11	148	39	17.8	18.2	31.9	23.4	71	65	113	64	1514	11	146	37.6	17.6	18.3	30.7	22.5	72	58	105	58
M	1271	10	146	37.9	17.8	19.3	30.6	22.4	68	58	106	67	1519	10	143	36.4	17.8	19.6	29.3	21.4	76	60	120	65
M	1575	10	152	46	19.9	21	36.3	26.6	83	67	105	68	1452	10	150	44.4	19.7	21.1	35	25.6	78	60	102	55
M	2083	12	155	46.1	19.2	20.2	36.8	26.9	78	63	117	68	2054	11	152	43.1	18.7	20	34.5	25.3	74	58	110	55
M	1834	11	158	48.1	19.3	20.4	38.3	28	83	78	102	51	1888	11	154	47	19.8	23.3	36	26.4	83	73	108	56
M	1746	12	170	50.3	17.4	18.4	41	30	83	62	125	53	1735	12	169	48.6	17	17.7	40	29.3	78	54	112	58
M	1346	12	159	42.4	16.8	16.1	35.6	26.1	77	62	110	66	1501	12	156	41	16.8	16.8	34.1	25	71	53	119	68
M	1611	12	162	50.4	19.2	18.2	41.2	30.2	76	67	110	66	1815	12	158	47.5	19	18.6	38.7	28.3	76	62	98	63
M	1742	13	159	59.5	23.5	24.2	45.1	33	93	74	121	61	1654	12	155	56.9	23.7	25.7	42.3	31	85	67	141	74
M	1500	11	155	36.3	15.1	13.5	31.4	23	70	59	108	59	1628	11	154	35.4	14.9	13.7	30.6	22.4	68	21	101	62
M	1762	12	152	41.6	18	16.5	34.7	25.4	72	55	115	52	1500	12	151	40.8	17.9	16.9	33.9	24.8	73	56	110	62
M	1129	13	146	37.1	17.4	18.5	30.2	22.1	77	63	117	67	1367	12	144	34.7	16.7	18.2	28.4	20.8	67	53	104	57
M	1987	12	160	49	19.1	17.6	40.4	29.6	78	59	118	58	1802	12	158	47.7	19.1	18.1	39.1	28.6	78	60	103	61
M	1536	12	160	48.3	18.9	21.4	38	27.8	84	66	123	66	1728	12	158	46.6	18.7	20.4	37.1	27.2	78	56	110	65
M	1532	13	153	39	16.7	18.3	31.9	23.4	72	58	100	56	1415	12	150	37.6	16.7	19.5	30.3	22.2	72	58	103	62
M	1537	12	160	41	16	15.3	34.7	25.4	79	62	108	71	1614	12	156	38.2	15.7	15.6	32.2	23.6	70	52	114	65
M	1331	12	144	49.1	23.7	28.1	35.3	25.8	83	64	117	62	1409	11	142	48	23.8	30.5	33.4	24.4	85	73	125	65
M	1643	12	146	40.5	19	20.1	32.4	23.7	77	54	102	62	1635	12	143	37.9	18.5	19.2	30.6	22.4	83	57	93	57
M	1686	13	156	48.3	19.8	15.7	40.7	29.8	78	58	102	65	1735	13	152	44.1	19.1	14.5	37.7	27.6	81	73	96	55
M	1606	13	161	45.2	17.4	15.2	38.3	28	83	62	108	57	1582	13	158	42.7	17.1	16.5	35.7	26.1	80	65	101	57
M	1622	13	160	49.2	19.2	14.7	42	30.7	84	66	118	70	1780	13	157	46.3	18.8	14.3	39.7	29.1	81	66	108	67
M	1805	13	182	59.1	17.8	16.3	49.5	36.2	84	60	122	63	1946	13	178	55.1	17.4	15.6	46.5	34	75	69	110	70
K	1270	14	154	53.7	22.6	33.9	35.5	26	91	72	118	73	1219	14	154	52.3	22.1	34.5	34.3	25.1	92	70	110	65
M	1854	14	164	52.1	19.4	17.7	42.9	31.4	86	64	120	64	1757	13	161	49.1	18.9	18.3	40.1	29.4	79	61	101	59
K	1438	13	162	56.4	21.5	26	41.7	30.5	91	71	114	66	1451	13	161	54.1	20.9	24.4	40.9	29.9	92	69	111	67
K	1699	14	158	48.9	19.6	23.9	37.2	27.2	85	63	131	82	1543	14	158	47	18.8	22.8	36.3	26.6	83	63	95	70
K	1633	14	163	53	19.9	25.6	39.4	28.8					1532	13	162	49.5	18.9	24.7	37.3	27.3	88	65	100	64
K	1641	14	165	54.4	20	29.7	38.2	28	90	68	112	71	1692	14	164	54.9	20.4	29.5	38.7	28.3	88	70	113	77
K	1985	14	165	57.1	21	29.1	40.5	29.6	95	64	123	74	1858	14	165	52.3	19.2	23.7	39.9	29.2	90	63	121	75
K	1705	14	166	51.1	18.5	22	39.9	29.2	90	63	102	56	1219	13	163	50.3	18.9	22.9	38.8	28.4	85	64	99	64
K	1624	15	162	54.7	20.8	28.7	39	28.5	92	69	127	80	1633	14	162	52.1	19.9	28.6	37.2	27.2	88	69	112	69
K	1588	15	170	51	17.6	22.6	39.5	28.9	88	61	124	62	1415	15	169	51.6	18.1	22.7	39.9	29.2	84	61	104	59
K	1694	15	165	55.1	20.2	28.7	39.3	28.8	90	61	115	63	1284	14	164	53.3	19.8	27	38.9	28.5	92	66	99	62
M	1906	15	173	70.9	23.7	19.1	57.4	42	96	76	120	70	2334	15	172	70.7	23.9	19.7	56.8	41.6	94	65	125	71
K	1779	15	163	53.9	20.3	24.4	40.7	29.8	86	63	113	69	1654	15	163	51.4	19.3	22.8	39.7	29.1	86	64	101	66
K	1722	16	177	57.9	18.5	22.6	44.8	32.8	89	64	107	66	1645	15	176	57	18.4	24.2	43.2	31.6	90	65	91	62
K	1386	15	161	47.3	18.2	21.8	37	27.1	81	64	113	65	1227	15	161	44.1	17	20.2	35.2	25.8	80	61	105	61
M	1764	15	171	56.6	19.4	17.1	46.9	34.3	91	71	127	74	1631	15	168	53.6	19	15	45.6	33.4	83	71	124	72
M	1790	15	166	51.4	18.7	15.7	43.3	31.7	88	70	113	65	1673	15	165	47.9	17.6	13.5	41.4	30.3	82	65	114	69
K	1741	16	165	66.2	24.3	28.3	47.5	34.8	100	73	123	67	1664	16	163	63.4	23.9	28.6	45.3	33.2	97	74	110	65
M	1888	16	172	61.4	20.8	15	52.2	38.2	93	72	110	64	1907	16	172	58.5	19.8	13.8	50.4	36.9	86	65	112	61
M	2226	16	167	63.9	22.9	17.5	52.7	38.6	91	76	100	55	2052	16	167	63.8	22.9	18.7	51.9	38	88	71	101	60
M	2249	17	177	67.5	21.5	15.3	57.2	41.9	88	69	128	56	2225	16	177	64.7	20.7	15.4	54.7	40	88	67	128	68
M	2682	16	180	82.7	25.5	23.2	63.5	46.5	108	84	146	66	2285	16	179	79.7	24.9	23.2	61.2	44.8	97	74	138	75
M	1884	16	179	60	18.7	15.8	50.5	37	85	64	126	68	1732	16	177	59	18.8	13.4	51.1	37.4	85	63	136	64
M	2164	17	186	72.4	20.9	13.9	62.3	45.6	98	75	112	62	2639	16	184	68.7	20.3	13.6	59.4	43.5	96	66	136	78
K	1691	17	172	61.9	20.9	26.2	45.7	33.5	96	69	114	74	1673	16	171	60.5	20.7	26.1	44.7	32.7	95	69	139	69
K	1480	17	167	63.4	22.7	26	46.9	34.3	96	69	116	61	1825	16	181	58.8	17.9	12.9	51.2	37.5	95	71	121	69
